# Supplementary material for: One-step in situ assembly of size-controlled silver nanoparticles on polyphenol-grafted collagen fiber with enhanced antibacterial properties
Source: Royal Society of Chemistry journal article supplement (doi:10.1039/c1nj20674e), 2011-01-01
Supplement: c1nj20674e.pdf [file c1nj20674e.pdf]

Supporting Information

**One-step *in situ* assembly of size-controlled silver nanoparticles on polyphenol-grafted collagen fiber with enhanced antibacterial property**

Hao Wu,<sup>a</sup> Li He,<sup>a</sup> Mingming Gao,<sup>a</sup> Siying Gao,<sup>b</sup> Xuepin Liao,<sup>\*,b</sup> and Bi Shi<sup>\*,a,b</sup>

<sup>a</sup> *National Engineering Laboratory of Clean Technology for Leather Manufacture, Sichuan University, Chengdu 610065, P. R. China*

<sup>b</sup> *The Department of Biomass Chemistry and Engineering, Sichuan University, Chengdu, 610065, P. R. China*

\* Corresponding Author. E-mail: [xpliao@scu.edu.cn](mailto:xpliao@scu.edu.cn); [sibitannin@vip.163.com](mailto:sibitannin@vip.163.com)

**Table S1.** Effects of EGCG grafting degree on the load and particle size of Ag on CF

| Samples                                      | Amount of EGCG used (g) | Grafted quantity of EGCG on CF (g) | Ag load (wt.%) | Ag particles <sup>b</sup> |         |
|----------------------------------------------|-------------------------|------------------------------------|----------------|---------------------------|---------|
|                                              |                         |                                    |                | Size (nm)                 | SD (nm) |
| <b>Ag-CF</b>                                 | 0                       | 0                                  | 0.83           | -                         | -       |
| <b>Ag-EGCG<sub>0.01</sub>-CF<sup>a</sup></b> | 0.05                    | 0.048                              | 1.22           | 22.3                      | 10.1    |
| <b>Ag-EGCG<sub>0.1</sub>-CF</b>              | 0.5                     | 0.485                              | 1.45           | 12.4                      | 6.3     |
| <b>Ag-EGCG<sub>0.3</sub>-CF</b>              | 1.5                     | 1.412                              | 1.57           | 6.1                       | 2.5     |
| <b>Ag-EGCG<sub>1.0</sub>-CF</b>              | 5.0                     | 2.135                              | 1.85           | 5.2                       | 1.4     |

<sup>a</sup> Subscript number stands for initial mass ratio of EGCG to CF. <sup>b</sup> The size and distribution of Ag particles were measured by TEM images.

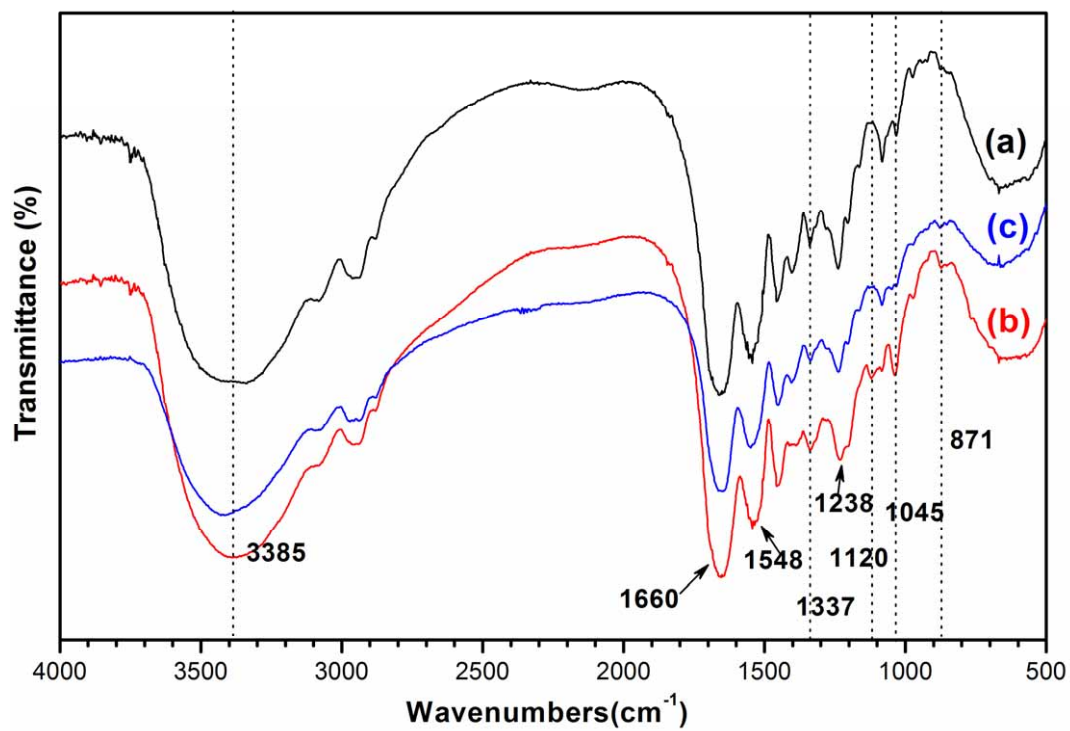

**Figure S1. FT-IR spectra of (a) CF, (b) EGCG-CF and (c) Ag-EGCG<sub>0.3</sub>-CF**
